# Supplementary material
Source: PubMed Central journal article supplement (PMC3030369)

**Supplementary Figure 1.** pLGIC ECDs and AChBPs  $\beta$ -core-buried residue composition. Amino acids forming the  $\beta$ -cores in the crystal structures of nAChR- $\alpha$ 1 (pdb entry 2QC1), GLIC (3EAM), *Lymnaea stagnalis* Ls-AChBP (1UV6) and *Aplysia californica* Ac-AChBP (2BYN) are plotted based on side-chain size and hydrophobicity. Only completely buried (ASA  $\leq$  5%) residues within 10Å ( $C_{\beta}$ - $C_{\beta}$  distance) from either site 1 or site 2 residues are included. White bars are numbers of hydrophilic (threonine, serine, cysteine not engaged in disulphide bridges) and small hydrophobic (alanine) residues, black bars are bulky hydrophobic (valine, leucine, isoleucine, methionine, phenylalanine, tyrosine, tryptophan) residues.

**Supplementary Figure 2.** Comparison of  $\beta$ -core (ASA  $\leq$  25%) amino acid composition of pLGIC ECDs and AChBPs within 10Å ( $C_{\beta}$ - $C_{\beta}$ ) from either site 1 or site 2 residues. Data plotted for nAChR- $\alpha$ 1, GLIC, Ls-AChBP and Ac-AChBP are based on crystal structures. For other eukaryotic pLGICs, putative  $\beta$ -core residues plotted are based on sequence alignments shown in Fig. 1. White bars are numbers of hydrophilic (threonine, serine, cysteine not engaged in disulphide bridges) and small hydrophobic (alanine) residues, black bars are bulky hydrophobic (valine, leucine, isoleucine, methionine, phenylalanine, tyrosine, tryptophan) residues.

**Supplementary Table 1.** List of amino acids in the  $\beta$ -cores of pLGIC ECDs and AChBPs within 10Å ( $C_{\beta}$ - $C_{\beta}$ ) from either site 1 or site 2 residues. Site 1 and site 2 amino acids are in red. Putative  $\beta$ -core residues of pLGICs for which crystal structures are not available are in italics. Residues with ASA  $\leq$  5% are in bold (the other residues have 5%  $\leq$  ASA  $\leq$  25%).

**Supplementary Table 2.** Summary of FOLDX analysis. Completely core-buried (ASA  $\leq$  5%) residues in nAChR- $\alpha$ 1, GLIC, Ls-AChBP and Ac-AChBP were mutated *in silico* to alanine, and  $\Delta\Delta G_{\text{folding}}$  values were calculated using FOLDX.  $\Delta\Delta G_{\text{folding}}$  values for site 1 and site 2 mutations are in red.

**Supplementary Table 3.**  $C_{\alpha}$ - $C_{\alpha}$  and  $C_{\beta}$ - $C_{\beta}$  distances of site 1 and site 2 residues in available crystal structures of nAChR- $\alpha$ 1 ECD, GLIC, and AChBPs bound to agonists and antagonists as well as in apo form. Distances reported are the average from the individual distances in each of the five subunits forming the pentameric assembly (with the exception of nAChR- $\alpha$ 1, which was crystallized in monomeric form).

**Supplementary Table 4.** Piperidine-4-sulphonic acid (P4S)  $EC_{50}$  values for WT and mutant GABA<sub>A</sub>Rs. Values are mean  $\pm$  SEM from n experiments. Ranges in  $I_{P4S_{\text{max}}}$  and  $I_{GABA_{\text{max}}}$  currents elicited from oocytes expressing WT or mutant GABA<sub>A</sub>Rs are indicated. Max current ratios from the same oocyte are mean  $\pm$  SEM from n experiments. Values statistically different from WT are indicated (\*  $p < 0.01$ ; \*\*  $p < 0.05$ ).

Supplementary Table 1.

|                                 | #1  | #2   | $\beta$ -core buried side-chains within 10Å ( $C_{\beta}$ - $C_{\beta}$ ) from site 1 or site 2 |     |     |     |     |     |      |      |      |      |      |      |      |      |      |      |
|---------------------------------|-----|------|-------------------------------------------------------------------------------------------------|-----|-----|-----|-----|-----|------|------|------|------|------|------|------|------|------|------|
| nAChR- $\alpha$ 1               | T52 | S126 | L35                                                                                             | L37 | L40 | V43 | V50 | V54 | A122 | F124 | C128 | C142 | M144 | —    | —    | Y203 | F205 | M207 |
| GABA <sub>A</sub> R- $\beta$ 2  | L59 | A134 | I42                                                                                             | I44 | I47 | V50 | Y57 | M61 | I130 | T132 | C136 | C150 | L152 | —    | —    | L210 | F212 | L214 |
| GABA <sub>A</sub> R- $\alpha$ 1 | I61 | A136 | I44                                                                                             | V46 | F49 | V52 | Y59 | V63 | L132 | V134 | C138 | C152 | L154 | —    | —    | T214 | F216 | L218 |
| GABA <sub>A</sub> R- $\gamma$ 2 | I74 | A149 | M57                                                                                             | V59 | I62 | V65 | Y72 | I76 | L145 | I147 | C151 | C165 | L167 | —    | —    | V225 | F227 | L229 |
| 5HT <sub>3A</sub> R             | T63 | T149 | V46                                                                                             | M48 | I51 | V54 | L61 | V65 | L132 | L134 | C136 | C152 | L154 | —    | —    | F215 | V217 | I219 |
| GlyR- $\alpha$ 1                | V60 | L136 | I43                                                                                             | I45 | F48 | I51 | Y58 | I62 | I132 | L134 | C138 | C152 | M154 | —    | —    | A212 | F214 | L216 |
| GLIC                            | V39 | V110 | I22                                                                                             | L24 | C27 | L30 | F37 | A41 | F106 | A108 | —    | L126 | I128 | —    | F165 | Y186 | L188 | —    |
| Ls-AChBP                        | V50 | F121 | L33                                                                                             | F35 | I38 | V41 | V48 | F52 | I117 | Q119 | C123 | C136 | I138 | —    | F171 | V197 | L199 | F201 |
| Ac-AChBP                        | L52 | F125 | F35                                                                                             | L37 | I40 | —   | V50 | Y54 | Q121 | L123 | C127 | C140 | V142 | F144 | Y174 | L200 | V202 | F204 |

Supplementary Table 2.

|                                   |                                    |      |      |      |      |             |      |       |              |       |       |       |       |       |       |
|-----------------------------------|------------------------------------|------|------|------|------|-------------|------|-------|--------------|-------|-------|-------|-------|-------|-------|
| <b>nAChR-<math>\alpha</math>1</b> | mutant $\Delta\Delta G$ (kcal/mol) | L35A | L37A | —    | V50A | <b>T52A</b> | V54A | F124A | <b>S126A</b> | M144A | —     | —     | Y203A | F205A | M207A |
|                                   |                                    | 4.01 | 3.56 | —    | 2.22 | 0.68        | 2.42 | 4.38  | -0.95        | 2.88  | —     | —     | 3.46  | 3.64  | 3.13  |
| <b>GLIC</b>                       | mutant $\Delta\Delta G$ (kcal/mol) | I22A | L24A | C27A | F37A | <b>V39A</b> | —    | F106A | <b>V110A</b> | L126A | I128A | F165A | Y186A | L188A | —     |
|                                   |                                    | 3.67 | 3.35 | 1.07 | 4.37 | 2.48        | —    | 4.48  | 2.66         | 3.10  | 3.87  | 4.72  | 4.87  | 3.46  | —     |
| <b>Ls-AChBP</b>                   | mutant $\Delta\Delta G$ (kcal/mol) | L33A | F35A | I38A | V48A | <b>V50A</b> | F52A | I117A | <b>F121A</b> | I138A | —     | F171A | V197A | L199A | F201A |
|                                   |                                    | 3.52 | 4.63 | 4.44 | 2.60 | 1.94        | 4.14 | 3.01  | 4.48         | 3.77  | —     | 4.08  | 3.05  | 4.31  | 5.56  |
| <b>Ac-AChBP</b>                   | mutant $\Delta\Delta G$ (kcal/mol) | F35A | L37A | I40A | V50A | <b>L52A</b> | Y54A | L123A | <b>F125A</b> | V142A | F144A | —     | L200A | L200A | V202A |
|                                   |                                    | 5.16 | 4.21 | 4.04 | 2.49 | 3.84        | 3.78 | 3.30  | 4.29         | 2.50  | 4.69  | —     | 3.76  | 3.76  | 2.62  |

Supplementary Table 3.

|                                            | $C_{\alpha} - C_{\alpha}$ | $C_{\beta} - C_{\beta}$ | resolution |
|--------------------------------------------|---------------------------|-------------------------|------------|
| <b>nAChR-<math>\alpha</math>1 ECD</b>      | 8.00 Å                    | 6.83 Å                  | 1.94 Å     |
| <b>GLIC, pH4.6</b>                         | 7.44 $\pm$ 0.03 Å         | 5.85 $\pm$ 0.02 Å       | 2.90 Å     |
| <b>GLIC, pH4.0</b>                         | 7.39 $\pm$ 0.02 Å         | 6.11 $\pm$ 0.01 Å       | 3.10 Å     |
| <b>Ac_AChBP, apo form</b>                  | 8.28 $\pm$ 0.02 Å         | 7.29 $\pm$ 0.04 Å       | 2.02 Å     |
| <b>Ac_AChBP, w/ EPI (+)</b>                | 8.28 $\pm$ 0.03 Å         | 7.32 $\pm$ 0.08 Å       | 3.40 Å     |
| <b>Ac_AChBP, w/ LOB (+)</b>                | 8.25 $\pm$ 0.08 Å         | 7.21 $\pm$ 0.08 Å       | 2.05 Å     |
| <b>Ac_AChBP, w/ MLA (-)</b>                | 8.27 $\pm$ 0.09 Å         | 7.14 $\pm$ 0.29 Å       | 2.45 Å     |
| <b>Ac_AChBP, w/ lml (-)</b>                | 8.29 $\pm$ 0.01 Å         | 7.30 $\pm$ 0.04 Å       | 2.07 Å     |
| <b>Ac_AChBP, w/ PnIA (-)</b>               | 8.36 $\pm$ 0.06 Å         | 7.32 $\pm$ 0.08 Å       | 2.40 Å     |
| <b>Ls_AChBP, w/ HEPES</b>                  | 7.96 $\pm$ 0.03 Å         | 6.58 $\pm$ 0.06 Å       | 2.10 Å     |
| <b>Ls_AChBP, w/ CCh</b>                    | 7.97 $\pm$ 0.02 Å         | 6.47 $\pm$ 0.03 Å       | 2.50 Å     |
| <b>Ls_AChBP, w/ nicotine</b>               | 7.95 $\pm$ 0.02 Å         | 6.66 $\pm$ 0.04 Å       | 2.20 Å     |
| <b>Ls_AChBP, w/ <math>\alpha</math>CTX</b> | 7.86 $\pm$ 0.03 Å         | 6.31 $\pm$ 0.05 Å       | 4.20 Å     |

Supplementary Table 4.

| Receptor                              | P4S EC <sub>50</sub>       | n | I <sub>P4Smax</sub><br>( $\mu$ A) | I <sub>GABAmax</sub><br>( $\mu$ A) | I <sub>P4Smax</sub> /<br>I <sub>GABAmax</sub> | I <sub>GABAmax</sub> /<br>I <sub>PBmax</sub> | I <sub>P4Smax</sub> /<br>I <sub>PBmax</sub> | n  |
|---------------------------------------|----------------------------|---|-----------------------------------|------------------------------------|-----------------------------------------------|----------------------------------------------|---------------------------------------------|----|
| WT                                    | 124.46 $\pm$ 7.38 $\mu$ M  | 5 | 2.53 – 6.29                       | 7.03 – 16.66                       | 0.35 $\pm$ 0.03                               | 1.75 $\pm$ 0.18                              | 0.61 $\pm$ 0.11                             | 7  |
| $\alpha\beta$ A134F $\gamma$          | 19.31 $\pm$ 3.36 mM        | 4 | 0.35 – 0.59                       | 1.76 – 3.89                        | 0.19 $\pm$ 0.03 **                            | 0.63 $\pm$ 0.07                              | 0.12 $\pm$ 0.03 *                           | 8  |
| $\alpha$ A136V $\beta$ A134V $\gamma$ | 475.30 $\pm$ 67.30 $\mu$ M | 3 | 0.44 – 4.33                       | 2.80 – 14.58                       | 0.24 $\pm$ 0.05                               | 0.77 $\pm$ 0.02                              | 0.18 $\pm$ 0.06 *                           | 11 |

Supplementary Figure 1.

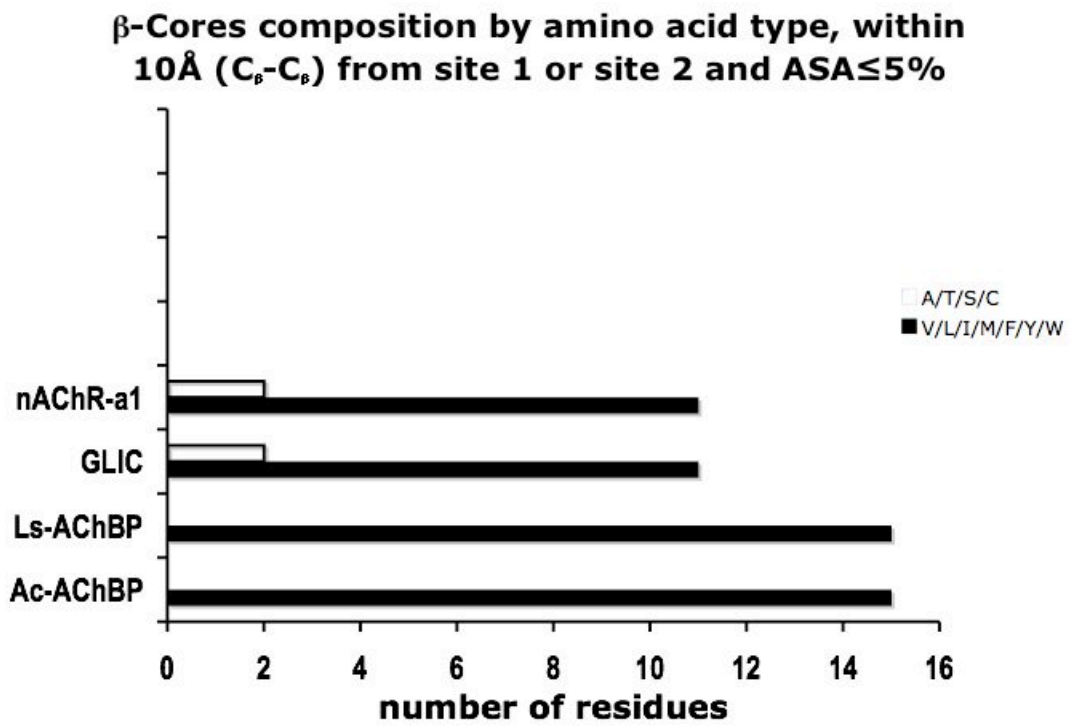

Supplementary Figure 2.

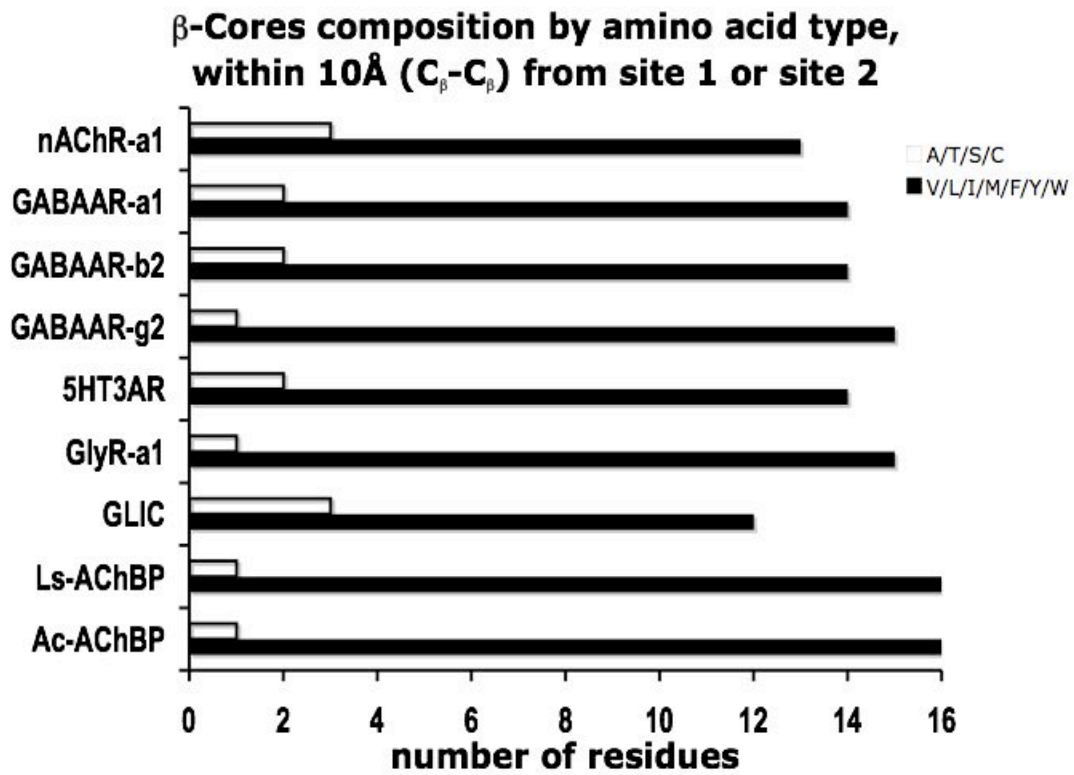

Supplement: supp_M110.156851_jbc.M110.156851-1.pdf [file supp_M110.156851_jbc.M110.156851-1.pdf]
